# Supplementary material for: National Trends in Sadness, Suicidality, and COVID-19 Pandemic–Related Risk Factors Among South Korean Adolescents From 2005 to 2021
Source: PubMed Central journal article supplement (PMC10209749; doi:10.1001/jamanetworkopen.2023.14838), 2023-05-24
Supplement: jamanetwopen-e2314838-s001.pdf [file jamanetwopen-e2314838-s001.pdf]

## Supplementary Online Content

Woo HG, Park S, Yon H, et al. National trends in sadness, suicidality, and COVID-19 pandemic–related risk factors among South Korean adolescents from 2005 to 2021. *JAMA Netw Open*. 2023;6(5):e2314838. doi:10.1001/jamanetworkopen.2023.14838

**eFigure 1.** The Method of Calculating the Weight

**eFigure 2.** Nationwide 17-Year Trends and Prevalence of Sadness and Suicidality Among One Million Korean Adolescents, 2005-2021

**eTable 1.** Demographic Characteristics of Participating Adolescents in the KYRBS, 2005-2021 (total n=1,109,776)

**eTable 2.** Univariate Logistic Regression Analysis for Sadness

**eTable 3.** Univariate Logistic Regression Analysis for Suicidality

**eTable 4.** Adjusted and Logistic Regression Analysis for Sadness, 2005-2021

**eTable 5.** Adjusted and Logistic Regression Analysis for Suicidality, 2005-2021

This supplementary material has been provided by the authors to give readers additional information about their work.

**eFigure 1.** The Method of Calculating the Weight

The weight was calculated by the Korea Centers for Disease Control and Prevention and is provided as a weight variable (W) in raw data. The weight is a value obtained by multiplying the inverse of the extraction rate and the inverse of the response rate by the post-calibration rate of the weight.

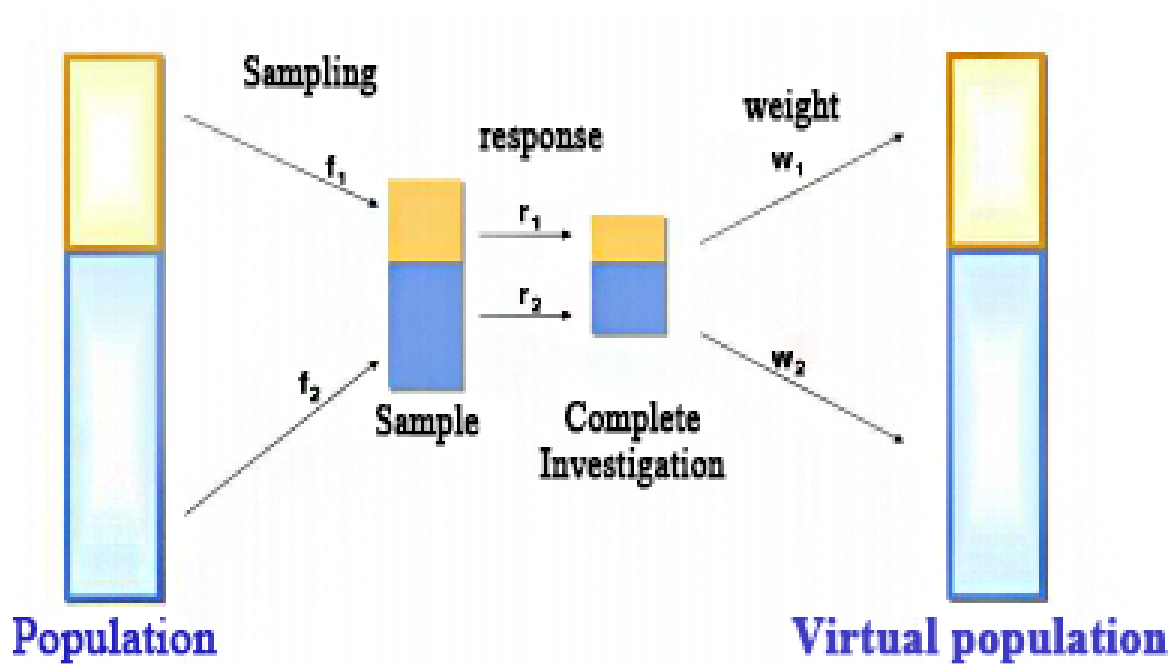

**eFigure 2.** Nationwide 17-Year Trends and Prevalence of Sadness and Suicidality Among One Million Korean Adolescents, 2005-2021

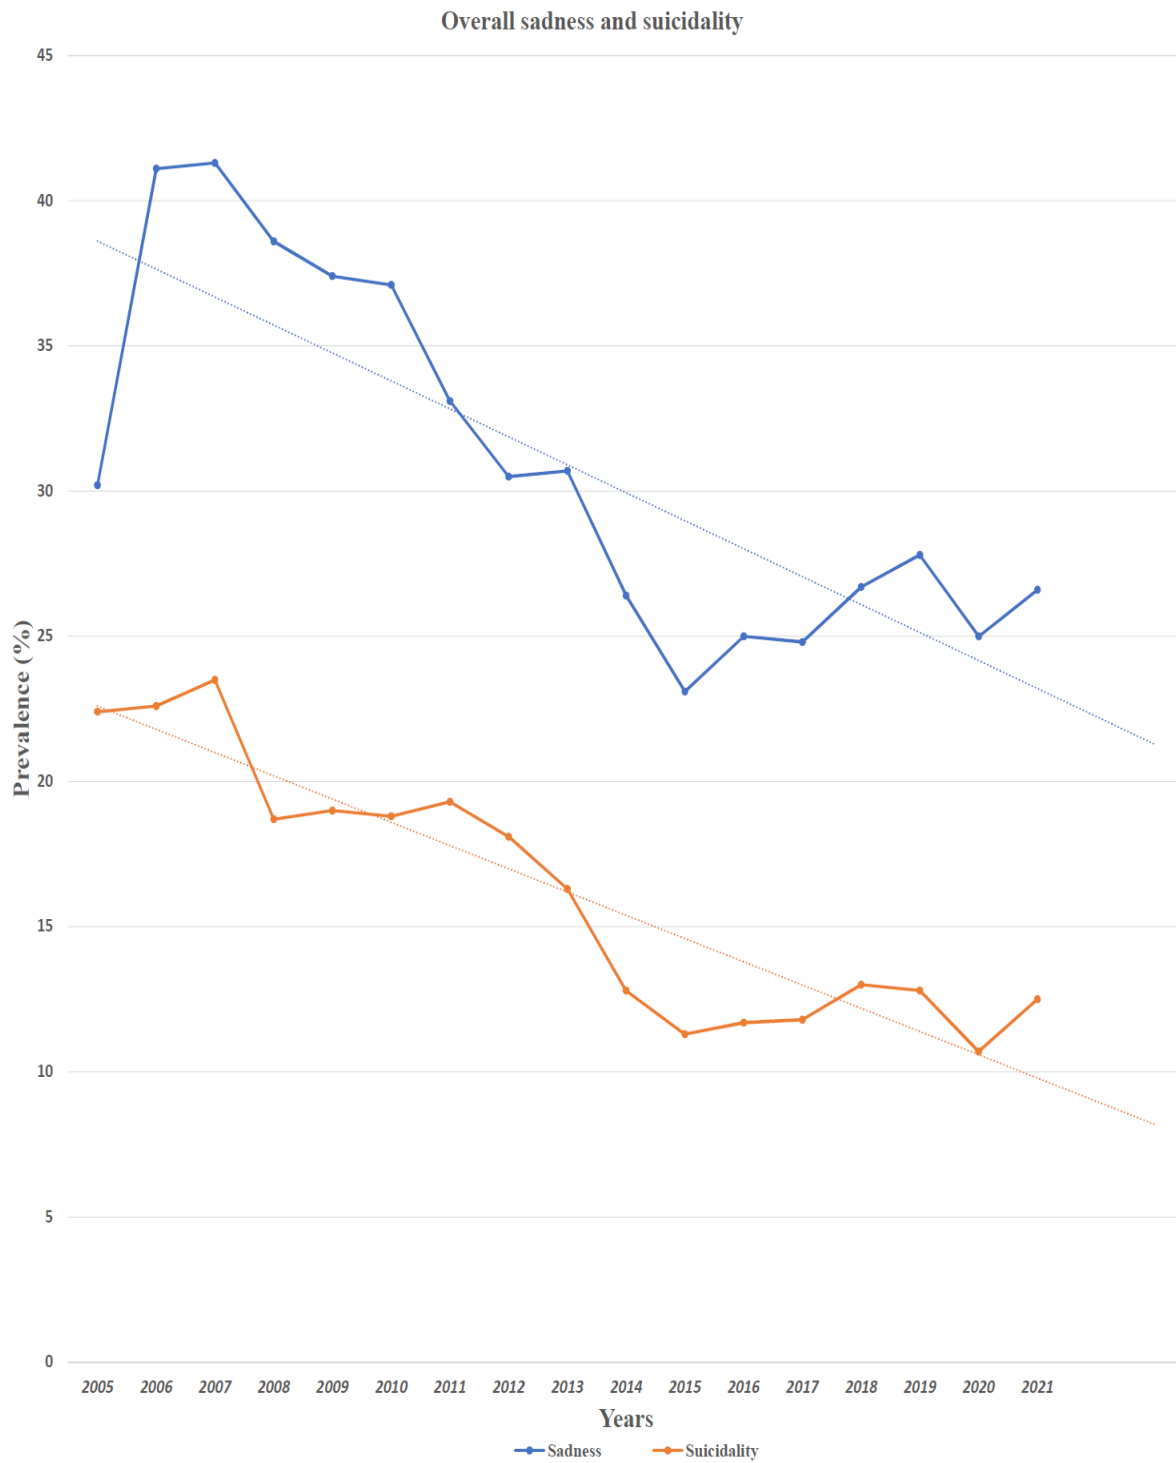

**eTable 1.** Demographic Characteristics of Participating Adolescents in the KYRBS, 2005-2021 (total n=1,109,776)

| Variables                          | Crude sample      |                |                |                |                |                               |
|------------------------------------|-------------------|----------------|----------------|----------------|----------------|-------------------------------|
|                                    | Overall           | 2005 to 2007   | 2008 to 2011   | 2012 to 2015   | 2016 to 2019   | COVID-19 pandemic (2020–2021) |
| Number, (%)                        | 1,109,776 (100.0) | 196,586 (17.7) | 289,384 (26.1) | 278,610 (25.1) | 238,217 (21.5) | 106,979 (9.6)                 |
| Age, years, mean ± SD              | 14.99 ± 1.74      | 14.93 ± 1.68   | 15.05 ± 1.75   | 14.92 ± 1.75   | 14.99 ± 1.76   | 15.09 ± 1.75                  |
| Grade, number (%)                  |                   |                |                |                |                |                               |
| 7th-9th grade (middle school)      | 573,932 (51.7)    | 107,463 (54.7) | 148,735 (51.4) | 140,502 (50.4) | 119,621 (50.2) | 57,611 (53.9)                 |
| 10th-12th grade (high school)      | 535,844 (48.3)    | 89,123 (45.3)  | 140,649 (48.6) | 138,108 (49.6) | 118,596 (49.8) | 49,368 (46.1)                 |
| Sex, number (%)                    |                   |                |                |                |                |                               |
| Male                               | 572,055 (51.5)    | 102,107 (51.9) | 149,903 (51.8) | 142,347 (51.1) | 122,238 (51.3) | 55,460 (51.8)                 |
| Female                             | 537,721 (48.5)    | 94,479 (48.1)  | 139,481 (48.2) | 136,263 (48.9) | 115,979 (48.7) | 51,519 (48.2)                 |
| BMI, kg/m <sup>2</sup> , mean ± SD | 20.81 ± 3.21      | 20.50 ± 2.99   | 20.48 ± 2.97   | 20.72 ± 3.09   | 21.22 ± 3.44   | 21.57 ± 3.75                  |
| Residence, number (%)              |                   |                |                |                |                |                               |

|                                                  |                |                |                |                |                |               |
|--------------------------------------------------|----------------|----------------|----------------|----------------|----------------|---------------|
| Rural                                            | 514,496 (46.4) | 94,189 (47.9)  | 143,301 (49.5) | 124,821 (44.8) | 105,787 (44.4) | 46,398 (43.4) |
| Urban                                            | 595,280 (53.6) | 102,397 (52.1) | 146,083 (50.5) | 153,789 (55.2) | 132,430 (55.6) | 60,581 (56.6) |
| Smoking, number (%)                              | 103,793 (9.4)  | 24,302 (12.4)  | 35,370 (12.2)  | 25,384 (9.1)   | 14,113 (5.9)   | 4,624 (4.3)   |
| Current alcohol use, number (%)                  | 211,679 (19.1) | 55,263 (28.1)  | 63,036 (21.8)  | 46,820 (16.8)  | 35,338 (14.8)  | 11,222 (10.5) |
| Sadness, number (%)                              | 347,456 (31.3) | 74,785 (38.0)  | 105,685 (36.5) | 77,385 (27.8)  | 61,979 (26.0)  | 27,622 (25.8) |
| Suicidality, number (%)                          | 182,421 (16.4) | 44,984 (22.9)  | 54,830 (18.9)  | 40,938 (14.7)  | 29,268 (12.3)  | 12,401 (11.6) |
| Highest educational level of parents, number (%) |                |                |                |                |                |               |
| High school or lower                             | 521,635 (47.0) | 128,261 (65.2) | 166,015 (57.4) | 128,176 (46.0) | 75,785 (31.8)  | 23,398 (21.9) |
| College or higher                                | 409,612 (36.9) | 47,439 (24.1)  | 91,016 (31.5)  | 113,366 (40.7) | 111,109 (46.6) | 46,682 (43.6) |
| Unknown                                          | 178,529 (16.1) | 20,886 (10.6)  | 32,353 (11.2)  | 37,068 (13.3)  | 51,323 (21.5)  | 36,899 (34.5) |
| Economic level, number (%)                       |                |                |                |                |                |               |
| High                                             | 87,663 (7.9)   | 13,312 (6.8)   | 17,309 (6.0)   | 20,768 (7.5)   | 24,669 (10.4)  | 11,605 (10.8) |
| Middle-high                                      | 291,759 (26.3) | 58,310 (29.7)  | 64,395 (22.3)  | 70,172 (25.2)  | 68,497 (28.8)  | 30,385 (28.4) |
| Middle                                           | 523,241 (47.1) | 87,735 (44.6)  | 137,681 (47.6) | 133,319 (47.9) | 112,330 (47.2) | 52,176 (48.8) |
| Middle-low                                       | 163,052 (14.7) | 29,192 (14.8)  | 52,948 (18.3)  | 43,167 (15.5)  | 27,131 (11.4)  | 10,614 (9.9)  |

|                                |                |               |               |               |               |               |
|--------------------------------|----------------|---------------|---------------|---------------|---------------|---------------|
| Low                            | 44,061 (4.0)   | 8,037 (4.1)   | 17,051 (5.9)  | 11,184 (4.0)  | 5,590 (2.3)   | 2,199 (2.1)   |
| School performance, number (%) |                |               |               |               |               |               |
| High                           | 135,726 (12.2) | 25,962 (13.2) | 32,493 (11.2) | 32,151 (11.5) | 31,665 (13.3) | 13,455 (12.6) |
| Middle-high                    | 281,457 (25.4) | 56,644 (28.8) | 69,136 (23.9) | 68,256 (24.5) | 60,999 (25.6) | 26,422 (24.7) |
| Middle                         | 316,853 (28.6) | 58,294 (29.7) | 78,687 (27.2) | 77,424 (27.8) | 69,677 (29.2) | 32,771 (30.6) |
| Middle-low                     | 259,611 (23.4) | 40,334 (20.5) | 73,975 (25.6) | 68,261 (24.5) | 53,092 (22.3) | 23,949 (22.4) |
| Low                            | 116,129 (10.5) | 15,352 (7.8)  | 35,093 (12.1) | 32,518 (11.7) | 22,784 (9.6)  | 10,382 (9.7)  |

BMI, body mass index; CI, confidence interval; KYRBS, Korea Youth Risk Behavior Web-based Survey; SD, standard deviation.

**eTable 2.** Univariate Logistic Regression Analysis for Sadness

| Variables                        | Overall (n=1,109,776)     |                 | Pre-COVID-19 pandemic<br>(n=1,002,797) |                 | COVID-19 pandemic<br>(n=106,979) |                 | Ratio of OR<br>(Pandemic/Pre)<br>(95% CI) | <i>p</i> -value |
|----------------------------------|---------------------------|-----------------|----------------------------------------|-----------------|----------------------------------|-----------------|-------------------------------------------|-----------------|
|                                  | Crude OR (95% CI)         | <i>p</i> -value | OR (95% CI)                            | <i>p</i> -value | OR (95% CI)                      | <i>p</i> -value |                                           |                 |
| Age                              | 1.087<br>(1.085 to 1.090) | <0.001          | 1.091<br>(1.089 to 1.094)              | <0.001          | 1.058<br>(1.050 to 1.066)        | <0.001          | 0.970<br>(0.962 to 0.977)                 | <0.001          |
| Grade                            |                           |                 |                                        |                 |                                  |                 |                                           |                 |
| 7th-9th grade<br>(middle school) | 1.000 (reference)         |                 | 1.000 (reference)                      |                 | 1.000 (reference)                |                 |                                           |                 |
| 10th-12th grade<br>(high school) | 1.262<br>(1.252 to 1.272) | <0.001          | 1.270<br>(1.259 to 1.281)              | <0.001          | 1.152<br>(1.121 to 1.184)        | <0.001          | 0.907<br>(0.881 to 0.933)                 | <0.001          |
| Sex                              |                           |                 |                                        |                 |                                  |                 |                                           |                 |
| Male                             | 1.000 (reference)         |                 | 1.000 (reference)                      |                 | 1.000 (reference)                |                 |                                           |                 |
| Female                           | 1.635<br>(1.622 to 1.648) | <0.001          | 1.630<br>(1.616 to 1.644)              | <0.001          | 1.701<br>(1.654 to 1.749)        | <0.001          | 1.044<br>(1.014 to 1.074)                 | 0.004           |
| BMI                              | 0.995                     | <0.001          | 0.998                                  | 0.006           | 0.992                            | <0.001          | 0.994                                     | 0.001           |

|                                      |                           |        |                           |        |                           |        |                           |        |
|--------------------------------------|---------------------------|--------|---------------------------|--------|---------------------------|--------|---------------------------|--------|
|                                      | (0.994 to 0.997)          |        | (0.997 to 0.999)          |        | (0.988 to 0.995)          |        | (0.990 to 0.998)          |        |
| Residence                            |                           |        |                           |        |                           |        |                           |        |
| Rural                                | 1.008<br>(1.000 to 1.017) | 0.04   | 1.015<br>(1.006 to 1.023) | 0.001  | 0.906<br>(0.881 to 0.931) | <0.001 | 0.893<br>(0.867 to 0.919) | <0.001 |
| Urban                                | 1.000 (reference)         |        | 1.000 (reference)         |        | 1.000 (reference)         |        |                           |        |
| Smoking                              | 2.061<br>(2.035 to 2.088) | <0.001 | 2.016<br>(1.989 to 2.042) | <0.001 | 2.438<br>(2.297 to 2.588) | <0.001 | 1.209<br>(1.137 to 1.286) | <0.001 |
| Current alcohol use                  | 2.003<br>(1.984 to 2.023) | <0.001 | 1.975<br>(1.955 to 1.995) | <0.001 | 2.078<br>(1.995 to 2.164) | <0.001 | 1.052<br>(1.009 to 1.097) | 0.02   |
| Highest educational level of parents |                           |        |                           |        |                           |        |                           |        |
| High school or lower                 | 1.000 (reference)         |        | 1.000 (reference)         |        | 1.000 (reference)         |        |                           |        |
| College or higher                    | 1.161<br>(1.151 to 1.171) | <0.001 | 1.141<br>(1.131 to 1.152) | <0.001 | 1.129<br>(1.090 to 1.170) | <0.001 | 0.989<br>(0.954 to 1.026) | 0.57   |
| Unknown                              | 0.861<br>(0.850 to 0.872) | <0.001 | 0.863<br>(0.851 to 0.874) | <0.001 | 0.965<br>(0.935 to 0.996) | 0.03   | 1.118<br>(1.080 to 1.157) | <0.001 |



|                    |                           |        |                           |        |                           |        |                           |       |
|--------------------|---------------------------|--------|---------------------------|--------|---------------------------|--------|---------------------------|-------|
| Economic level     |                           |        |                           |        |                           |        |                           |       |
| High               | 1.000 (reference)         |        | 1.000 (reference)         |        | 1.000 (reference)         |        |                           |       |
| Middle-high        | 1.038<br>(1.021 to 1.056) | <0.001 | 1.033<br>(1.014 to 1.052) | <0.001 | 1.022<br>(0.972 to 1.075) | 0.39   | 0.989<br>(0.938 to 1.044) | 0.70  |
| Middle             | 1.113<br>(1.095 to 1.131) | <0.001 | 1.111<br>(1.093 to 1.130) | <0.001 | 1.048<br>(1.000 to 1.099) | 0.05   | 0.943<br>(0.906 to 0.982) | 0.004 |
| Middle-low         | 1.692<br>(1.662 to 1.722) | <0.001 | 1.670<br>(1.639 to 1.702) | <0.001 | 1.646<br>(1.552 to 1.745) | <0.001 | 0.986<br>(0.927 to 1.048) | 0.65  |
| Low                | 2.510<br>(2.451 to 2.571) | <0.001 | 2.466<br>(2.405 to 2.528) | <0.001 | 2.509<br>(2.283 to 2.758) | <0.001 | 1.017<br>(0.923 to 1.122) | 0.73  |
| School performance |                           |        |                           |        |                           |        |                           |       |
| High               | 1.000 (reference)         |        | 1.000 (reference)         |        | 1.000 (reference)         |        |                           |       |
| Middle-high        | 1.128<br>(1.112 to 1.145) | <0.001 | 1.132<br>(1.115 to 1.149) | <0.001 | 1.074<br>(1.022 to 1.129) | 0.005  | 0.949<br>(0.901 to 0.999) | 0.04  |
| Middle             | 1.237<br>(1.219 to 1.255) | <0.001 | 1.247<br>(1.228 to 1.265) | <0.001 | 1.159<br>(1.105 to 1.216) | <0.001 | 0.929<br>(0.884 to 0.977) | 0.004 |

|            |                           |        |                           |        |                           |        |                           |      |
|------------|---------------------------|--------|---------------------------|--------|---------------------------|--------|---------------------------|------|
| Middle-low | 1.552<br>(1.529 to 1.574) | <0.001 | 1.556<br>(1.533 to 1.580) | <0.001 | 1.482<br>(1.410 to 1.557) | <0.001 | 0.952<br>(0.904 to 1.003) | 0.07 |
| Low        | 1.999<br>(1.966 to 2.033) | <0.001 | 1.995<br>(1.960 to 2.031) | <0.001 | 2.005<br>(1.894 to 2.124) | <0.001 | 1.005<br>(0.946 to 1.067) | 0.87 |

BMI, body mass index.

The odds ratio was calculated for 1 unit increase in BMI (1kg/m<sup>2</sup>).

Numbers in bold indicate a significant difference ( $p < 0.05$ ).

1 **eTable 3.** Univariate Logistic Regression Analysis for Suicidality

| Variables                        | Overall (n=1,109,776)     |         | Pre-COVID-19 pandemic<br>(n=1,002,797) |         | COVID-19 pandemic<br>(n=106,979) |         | Ratio of OR<br>(Pandemic/Pre)<br>(95% CI) | p-value |
|----------------------------------|---------------------------|---------|----------------------------------------|---------|----------------------------------|---------|-------------------------------------------|---------|
|                                  | Crude OR (95% CI)         | p-value | OR (95% CI)                            | p-value | OR (95% CI)                      | p-value |                                           |         |
| Age                              | 1.000<br>(0.997 to 1.003) | 0.97    | 1.001<br>(0.998 to 1.004)              | 0.46    | 1.003<br>(0.992 to 1.014)        | 0.59    | 1.002<br>(0.991 to 1.013)                 | 0.73    |
| Grade                            |                           |         |                                        |         |                                  |         |                                           |         |
| 7th-9th grade<br>(middle school) | 1.000 (reference)         |         | 1.000 (reference)                      |         | 1.000 (reference)                |         |                                           |         |
| 10th-12th grade<br>(high school) | 0.965<br>(0.955 to 0.975) | <0.001  | 0.960<br>(0.950 to 0.970)              | <0.001  | 0.981<br>(0.945 to 1.018)        | 0.31    | 1.022<br>(0.983 to 1.062)                 | 0.27    |
| Sex                              |                           |         |                                        |         |                                  |         |                                           |         |
| Male                             | 1.000 (reference)         |         | 1.000 (reference)                      |         | 1.000 (reference)                |         |                                           |         |
| Female                           | 1.728<br>(1.711 to 1.746) | <0.001  | 1.717<br>(1.699 to 1.735)              | <0.001  | 1.893<br>(1.822 to 1.967)        | <0.001  | 1.103<br>(1.060 to 1.147)                 | <0.001  |
| BMI                              | 0.998                     | 0.02    | 1.001                                  | 0.34    | 1.002                            | 0.40    | 1.001                                     | 0.71    |

|                                      |                           |        |                           |        |                           |        |                           |        |
|--------------------------------------|---------------------------|--------|---------------------------|--------|---------------------------|--------|---------------------------|--------|
|                                      | (0.997 to 1.000)          |        | (0.999 to 1.002)          |        | (0.997 to 1.007)          |        | (0.996 to 1.006)          |        |
| Residence                            |                           |        |                           |        |                           |        |                           |        |
| Rural                                | 1.020<br>(1.010 to 1.031) | <0.001 | 1.024<br>(1.013 to 1.034) | <0.001 | 0.920<br>(0.886 to 0.956) | <0.001 | 0.898<br>(0.864 to 0.935) | <0.001 |
| Urban                                | 1.000 (reference)         |        | 1.000 (reference)         |        | 1.000 (reference)         |        |                           |        |
| Smoking                              | 2.056<br>(2.026 to 2.087) | <0.001 | 2.003<br>(1.973 to 2.033) | <0.001 | 2.359<br>(2.196 to 2.533) | <0.001 | 1.178<br>(1.096 to 1.265) | <0.001 |
| Current alcohol use                  | 1.917<br>(1.895 to 1.939) | <0.001 | 1.874<br>(1.852 to 1.897) | <0.001 | 2.071<br>(1.969 to 2.179) | <0.001 | 1.105<br>(1.050 to 1.164) | <0.001 |
| Highest educational level of parents |                           |        |                           |        |                           |        |                           |        |
| High school or lower                 | 1.000 (reference)         |        | 1.000 (reference)         |        | 1.000 (reference)         |        |                           |        |
| College or higher                    | 1.159<br>(1.146 to 1.172) | <0.001 | 1.134<br>(1.122 to 1.147) | <0.001 | 1.093<br>(1.042 to 1.146) | <0.001 | 0.964<br>(0.918 to 1.012) | 0.14   |
| Unknown                              | 0.876<br>(0.863 to 0.890) | <0.001 | 0.909<br>(0.893 to 0.924) | <0.001 | 0.882<br>(0.844 to 0.921) | <0.001 | 0.970<br>(0.926 to 1.017) | 0.21   |

|                    |                            |        |                           |        |                           |        |                           |        |
|--------------------|----------------------------|--------|---------------------------|--------|---------------------------|--------|---------------------------|--------|
| Economic level     |                            |        |                           |        |                           |        |                           |        |
| High               | 1.000 (reference)          |        | 1.000 (reference)         |        | 1.000 (reference)         |        |                           |        |
| Middle-high        | 1.023 (<br>1.001 to 1.045) | 0.04   | 1.001<br>(0.979 to 1.024) | 0.90   | 1.119<br>(1.041 to 1.203) | 0.002  | 1.118<br>(1.036 to 1.206) | 0.004  |
| Middle             | 1.064<br>(1.042 to 1.086)  | <0.001 | 1.041<br>(1.019 to 1.063) | <0.001 | 1.152<br>(1.077 to 1.234) | <0.001 | 1.107<br>(1.031 to 1.188) | 0.005  |
| Middle-low         | 1.740<br>(1.702 to 1.780)  | <0.001 | 1.669<br>(1.630 to 1.708) | <0.001 | 2.156<br>(1.992 to 2.334) | <0.001 | 1.292<br>(1.189 to 1.403) | <0.001 |
| Low                | 2.742<br>(2.667 to 2.819)  | <0.001 | 2.624<br>(2.550 to 2.701) | <0.001 | 3.277<br>(2.923 to 3.674) | <0.001 | 1.249<br>(1.110 to 1.405) | <0.001 |
| School performance |                            |        |                           |        |                           |        |                           |        |
| High               | 1.000 (reference)          |        | 1.000 (reference)         |        | 1.000 (reference)         |        |                           |        |
| Middle-high        | 1.044<br>(1.025 to 1.063)  | <0.001 | 1.045<br>(1.025 to 1.066) | <0.001 | 0.999<br>(0.933 to 1.069) | 0.97   | 0.956<br>(0.891 to 1.026) | 0.21   |
| Middle             | 1.078<br>(1.058 to 1.097)  | <0.001 | 1.087<br>(1.067 to 1.108) | <0.001 | 0.992<br>(0.929 to 1.060) | 0.82   | 0.913<br>(0.852 to 0.977) | 0.009  |

|            |                                  |        |                                  |        |                                  |        |                                  |             |
|------------|----------------------------------|--------|----------------------------------|--------|----------------------------------|--------|----------------------------------|-------------|
| Middle-low | <b>1.381</b><br>(1.356 to 1.406) | <0.001 | <b>1.384</b><br>(1.358 to 1.410) | <0.001 | <b>1.304</b><br>(1.220 to 1.395) | <0.001 | <b>0.942</b><br>(0.879 to 1.010) | <b>0.09</b> |
| Low        | <b>1.824</b><br>(1.787 to 1.862) | <0.001 | <b>1.819</b><br>(1.781 to 1.858) | <0.001 | <b>1.824</b><br>(1.692 to 1.967) | <0.001 | <b>1.003</b><br>(0.927 to 1.084) | <b>0.95</b> |

2 BMI, body mass index.

3 The odds ratio was calculated for 1 unit increase in BMI (1kg/m<sup>2</sup>).

4 Numbers in bold indicate a significant difference ( $p < 0.05$ ).

5

6

7

8 **eTable 4.** Adjusted and Logistic Regression Analysis for Sadness, 2005-2021

| Variables                            | Overall<br>(n=1,109,776) |         |
|--------------------------------------|--------------------------|---------|
|                                      | OR (95% CI)              | p-value |
| Survey cycle                         |                          |         |
| 2005 to 2007                         | 1.747 (1.703 to 1.793)   | <0.001  |
| 2008 to 2011                         | 1.644 (1.606 to 1.684)   | <0.001  |
| 2012 to 2015                         | 1.106 (1.080 to 1.133)   | <0.001  |
| 2016 to 2019                         | 1.017 (0.992 to 1.042)   | 0.18    |
| 2020 to 2021 (Pandemic period)       | 1.000 (reference)        |         |
| Grade                                |                          |         |
| 7th-9th grade (middle school)        | 1.000 (reference)        |         |
| 10th-12th grade (high school)        | 1.262 (1.252 to 1.272)   | <0.001  |
| Sex                                  |                          |         |
| Male                                 | 1.000 (reference)        |         |
| Female                               | 1.757 (1.742 to 1.772)   | <0.001  |
| BMI                                  | 0.997 (0.996 to 0.999)   | <0.001  |
| Residence                            |                          |         |
| Rural                                | 1.000 (reference)        |         |
| Urban                                | 0.973 (0.964 to 0.890)   | <0.001  |
| Smoking                              | 1.556 (1.533 to 1.580)   | <0.001  |
| Current alcohol use                  | 1.687 (1.668 to 1.706)   | <0.001  |
| Highest educational level of parents |                          |         |

|                      |                        |        |
|----------------------|------------------------|--------|
| High school or lower | 1.000 (reference)      |        |
| College or higher    | 0.969 (0.960 to 0.978) | <0.001 |
| Unknown              | 0.792 (0.781 to 0.802) | <0.001 |
| Economic level       |                        |        |
| High                 | 1.000 (reference)      |        |
| Middle-high          | 0.957 (0.940 to 0.974) | <0.001 |
| Middle               | 0.948 (0.932 to 0.964) | <0.001 |
| Middle-low           | 1.343 (1.318 to 1.369) | <0.001 |
| Low                  | 1.857 (1.810 to 1.904) | <0.001 |
| School performance   |                        |        |
| High                 | 1.000 (reference)      |        |
| Middle-high          | 1.087 (1.070 to 1.103) | <0.001 |
| Middle               | 1.171 (1.154 to 1.189) | <0.001 |
| Middle-low           | 1.369 (1.347 to 1.390) | <0.001 |
| Low                  | 1.601 (1.572 to 1.630) | <0.001 |

9 BMI, body mass index.

10 The odds ratio was calculated for 1 unit increase in BMI (1kg/m<sup>2</sup>).

11 This model was adjusted for survey cycle, age, grade, sex, BMI, smoking status, current  
12 alcohol use, parents' highest educational level, economic level, and school performance.

13 Numbers in bold indicate a significant difference ( $p < 0.05$ ).

14

15



16 **eTable 5.** Adjusted and Logistic Regression Analysis for Suicidality, 2005-2021

| Variables                            | Overall<br>(n=1,109,776) |         |
|--------------------------------------|--------------------------|---------|
|                                      | Crude OR (95% CI)        | p-value |
| Survey cycle                         |                          |         |
| 2005 to 2007                         | 2.273 (2.202 to 2.346)   | <0.001  |
| 2008 to 2011                         | 1.780 (1.727 to 1.836)   | <0.001  |
| 2012 to 2015                         | 1.311 (1.272 to 1.352)   | <0.001  |
| 2016 to 2019                         | 1.069 (1.036 to 1.103)   | <0.001  |
| 2020 to 2021 (Pandemic period)       | 1.000 (reference)        |         |
| Grade                                |                          |         |
| 7th-9th grade (middle school)        | 1.000 (reference)        |         |
| 10th-12th grade (high school)        | 0.751 (0.743 to 0.760)   | <0.001  |
| Sex                                  |                          |         |
| Male                                 | 1.000 (reference)        |         |
| Female                               | 1.904 (1.884 to 1.925)   | <0.001  |
| BMI                                  | 1.011 (1.010 to 1.013)   | <0.001  |
| Residence                            |                          |         |
| Rural                                | 1.045 (1.035 to 1.056)   | <0.001  |
| Urban                                | 1.000 (reference)        |         |
| Smoking                              | 1.689 (1.660 to 1.718)   | <0.001  |
| Current alcohol use                  | 1.689 (1.686 to 1.732)   | <0.001  |
| Highest educational level of parents |                          |         |

|                      |                        |        |
|----------------------|------------------------|--------|
| High school or lower | 1.000 (reference)      |        |
| College or higher    | 0.978 (0.967 to 0.989) | <0.001 |
| Unknown              | 0.780 (0.767 to 0.793) | <0.001 |
| Economic level       |                        |        |
| High                 | 1.000 (reference)      |        |
| Middle-high          | 0.981 (0.960 to 1.003) | 0.10   |
| Middle               | 0.982 (0.961 to 1.003) | 0.98   |
| Middle-low           | 1.535 (1.500 to 1.572) | <0.001 |
| Low                  | 2.275 (2.209 to 2.343) | <0.001 |
| School performance   |                        |        |
| High                 | 1.000 (reference)      |        |
| Middle-high          | 1.008 (0.989 to 1.028) | 0.40   |
| Middle               | 1.028 (1.009 to 1.048) | 0.004  |
| Middle-low           | 1.192 (1.170 to 1.216) | <0.001 |
| Low                  | 1.383 (1.353 to 1.414) | <0.001 |

17 BMI, body mass index.

18 The odds ratio was calculated for 1 unit increase in BMI (1kg/m<sup>2</sup>).

19 This model was adjusted for survey cycle, age, grade, sex, BMI, smoking status, current  
20 alcohol use, parents' highest educational level, economic level, and school performance.

21 Numbers in bold indicate a significant difference ( $p < 0.05$ ).
