# Supplementary material for: National Trends in Sadness, Suicidality, and COVID-19 Pandemic–Related Risk Factors Among South Korean Adolescents From 2005 to 2021
Source: PubMed Central journal article supplement (PMC10209749; doi:10.1001/jamanetworkopen.2023.14838), 2023-05-24
Supplement: jamanetwopen-e2314838-s002.pdf [file jamanetwopen-e2314838-s002.pdf]

## Data Sharing Statement

Woo. National Trends in Sadness, Suicidality, and COVID-19 Pandemic–Related Risk Factors Among South Korean Adolescents From 2005 to 2021. *JAMA Netw Open*. Published May 24, 2023. doi:10.1001/jamanetworkopen.2023.14838

### Data

**Data available:** No

### Additional Information

**Explanation for why data not available:** Data are available on reasonable request. Study protocol, statistical code: available from DKYon (email: [yonkkang@gmail.com](mailto:yonkkang@gmail.com)). Data set: available from the Korea Disease Control and Prevention Agency through a data use agreement.
